# Supplementary material for: Estimation of anisotropic bending rigidities and spontaneous curvatures of crescent curvature-inducing proteins from tethered-vesicle experimental data
Source: Royal Society of Chemistry journal article supplement (doi:10.1039/d3sm00340j), 2023-01-01
Supplement: d3sm00340j1.pdf [file d3sm00340j1.pdf]

# Supplementary Information for Estimation of anisotropic bending rigidity and spontaneous curvature of crescent curvature-inducing proteins from tethered-vesicle experimental data

Hiroshi Noguchi,<sup>1</sup> Nikhil Walani,<sup>2</sup> and Marino Arroyo<sup>2,3,4</sup>

<sup>1</sup>*Institute for Solid State Physics, University of Tokyo, Kashiwa, Chiba 277-8581, Japan*

*Correspondence to: noguchi@issp.u-tokyo.ac.jp*

<sup>2</sup>*Universitat Politècnica de Catalunya-BarcelonaTech, 08034 Barcelona, Spain*

<sup>3</sup>*Institute for Bioengineering of Catalonia (IBEC),*

*The Barcelona Institute for Science and Technology (BIST), 08028 Barcelona, Spain*

<sup>4</sup>*Centre Internacional de Mètodes Numèrics en Enginyeria (CIMNE), 08034 Barcelona, Spain*

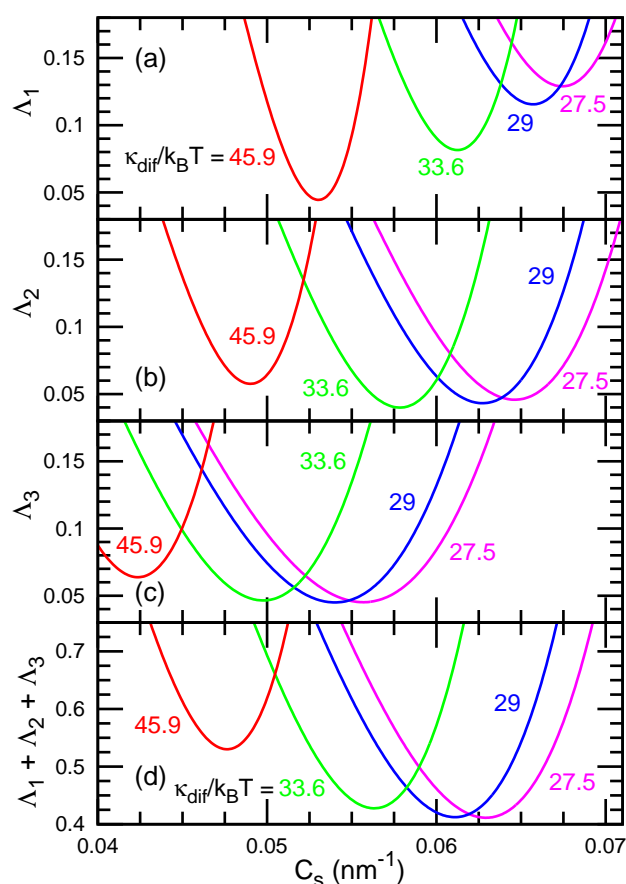

Fig. S 1. Fit deviation as a function of the sensing curvature  $C_s$  for I-BAR-domain binding based on the isotropic protein model. From left to right,  $\kappa_{\text{dif}}/k_B T = 45.9, 33.6, 29$ , and  $27.5$ . (a) Fit deviation  $\Lambda_1$  for  $\phi_v = 0.0013$ . The minimum  $\Lambda_1^{\text{min}} = 0.0444$  is obtained at  $\kappa_{\text{dif}}/k_B T = 45.9$  and  $C_s = 0.0530 \text{ nm}^{-1}$  (corresponding to Fig. 2(a)). (b) Fit deviation  $\Lambda_2$  for  $\phi_v = 0.02$ . The minimum  $\Lambda_2^{\text{min}} = 0.0399$  is obtained at  $\kappa_{\text{dif}}/k_B T = 33.6$  and  $C_s = 0.0578 \text{ nm}^{-1}$  (corresponding to Fig. 2(b)). (c) Fit deviation  $\Lambda_3$  for  $\phi_v = 0.05$ . The minimum  $\Lambda_3^{\text{min}} = 0.0450$  is obtained at  $\kappa_{\text{dif}}/k_B T = 29.0$  and  $C_s = 0.0540 \text{ nm}^{-1}$  (corresponding to Fig. 2(c)). (d) Sum of fit deviations  $\Lambda_1 + \Lambda_2 + \Lambda_3$ . The minimum  $(\Lambda_1 + \Lambda_2 + \Lambda_3)^{\text{min}} = 0.411$  is obtained at  $\kappa_{\text{dif}}/k_B T = 27.5$  and  $C_s = 0.0629 \text{ nm}^{-1}$  (corresponding to Fig. 2(d)).

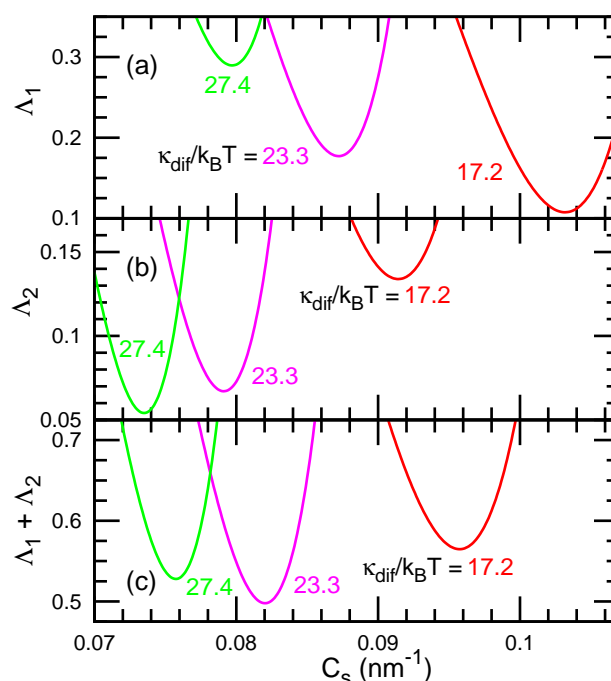

Fig. S 2. Fit deviation as a function of the sensing curvature  $C_s$  for N-BAR-domain binding based on the isotropic protein model. From left to right,  $\kappa_{\text{dif}}/k_B T = 27.4, 23.3$ , and  $17.2$ . (a) Fit deviation  $\Lambda_1$  for  $\phi_v = 0.0013$ . The minimum  $\Lambda_1^{\text{min}} = 0.1075$  is obtained at  $\kappa_{\text{dif}}/k_B T = 17.2$  and  $C_s = 0.1032 \text{ nm}^{-1}$  (corresponding to Fig. 9(a)). (b) Fit deviation  $\Lambda_2$  for  $\phi_v = 0.0043$ . The minimum  $\Lambda_2^{\text{min}} = 0.0541$  is obtained at  $\kappa_{\text{dif}}/k_B T = 27.4$  and  $C_s = 0.0735 \text{ nm}^{-1}$  (corresponding to Fig. 9(b)). (c) Sum of fit deviations  $\Lambda_1 + \Lambda_2$ . The minimum  $(\Lambda_1 + \Lambda_2)^{\text{min}} = 0.498$  is obtained at  $\kappa_{\text{dif}}/k_B T = 23.3$  and  $C_s = 0.0820 \text{ nm}^{-1}$  (corresponding to Fig. 9(c)).
